# Supplementary material for: Comparison of Treatment Outcomes for T3 Glottic Squamous Cell Carcinoma: A Meta-Analysis
Source: PubMed Central journal article supplement — Clin Exp Otorhinolaryngol. 2018 Feb 22;11(1):1–8. doi: 10.21053/ceo.2017.00717 (PMC5831661; doi:10.21053/ceo.2017.00717), 2018-02-22
Supplement: ceo-2017-00717-s001.pdf [file ceo-2017-00717-s001.pdf]

**Supplementary Table 1.** National Institute for Health and Care Excellence (NICE) tool for quality assessment of case-series

| Question                                                                        |
|---------------------------------------------------------------------------------|
| 1. Were the case series collected in more than one centre?                      |
| 2. Is the hypothesis/aim/objective of the study clearly described?              |
| 3. Are the inclusion and exclusion criteria (case definition) clearly reported? |
| 4. Is there a clear definition of outcomes reported?                            |
| 5. Were data collected prospectively?                                           |
| 6. Is there an explicit statement that patients were recruited consecutively?   |
| 7. Are the main findings of the study clearly described?                        |
| 8. Are outcomes stratified?                                                     |
